# Supplementary material for: Polymeric Nanoparticles Active against Dual-Species Bacterial Biofilms
Source: MDPI journal article supplement (doi:10.3390/molecules26164958), 2021-08-16
Supplement: s1 [file s1]

## Polymeric Nanoparticles Active against Dual-Species Bacterial Biofilms

Jessa Marie V. Makabenta <sup>1,†</sup>, Jungmi Park <sup>1,†</sup>, Cheng-Hsuan Li <sup>1</sup>, Aritra Nath Chattopadhyay <sup>1</sup>, Ahmed Nabawy <sup>1</sup>, Ryan F. Landis <sup>1</sup>, Akash Gupta <sup>1</sup>, Suzannah Schmidt-Malan <sup>2</sup>, Robin Patel <sup>2</sup> and Vincent M. Rotello <sup>1,\*</sup>

<sup>1</sup> Department of Chemistry, University of Massachusetts Amherst, Amherst, MA 01003, USA; jmakabenta@umass.edu (J.M.V.M.); jungmipark@umass.edu (J.P.); chenghsuanli@umass.edu (C.-H.L.); aritrnathch@umass.edu (A.N.C.); anabawy@umass.edu (A.N.); rlandis@translate.bio (R.F.L.); akashgup@mit.edu (A.G.)

<sup>2</sup> Division of Clinical Microbiology, Department of Laboratory Medicine and Pathology, Mayo Clinic, Rochester, MN 55901, USA; schmidtmalan.suzannah@mayo.edu (S.S.-M.); patel.robin@mayo.edu (R.P.)

\* Correspondence: rotello@chem.umass.edu

<sup>†</sup> These authors contributed equally to this work.

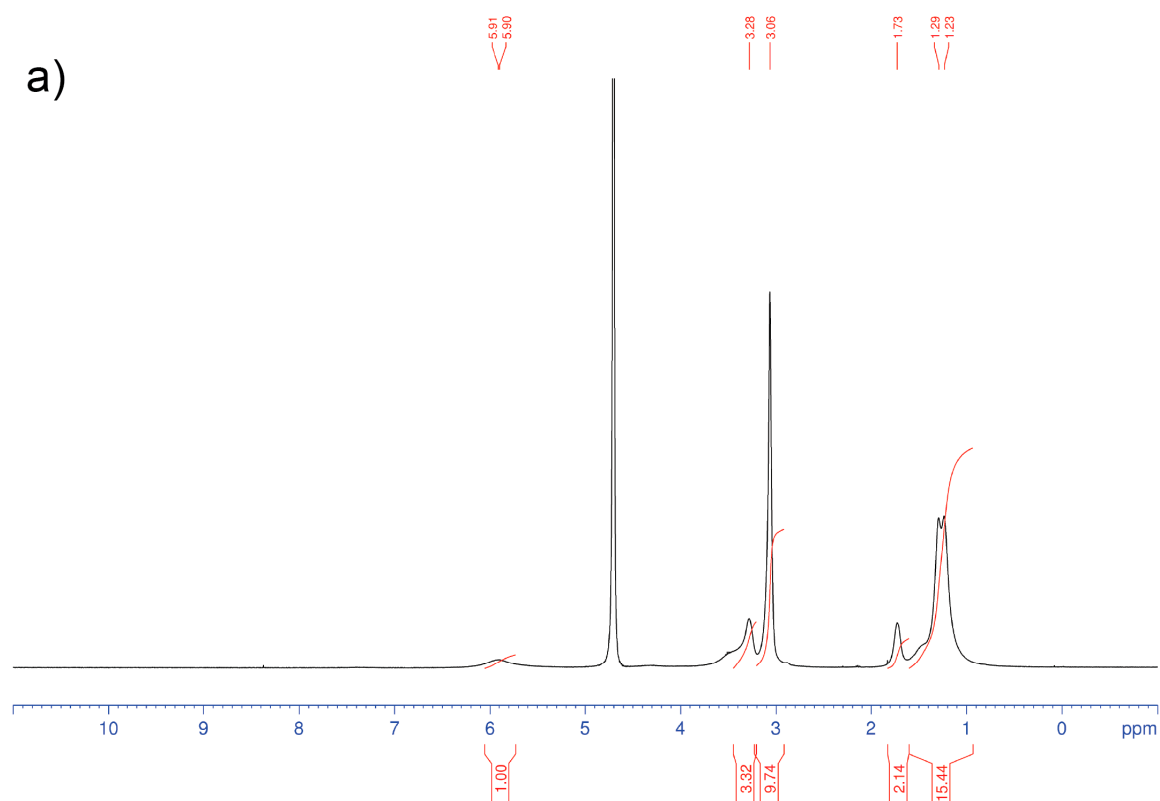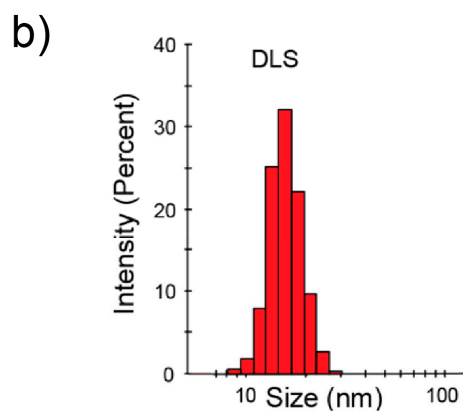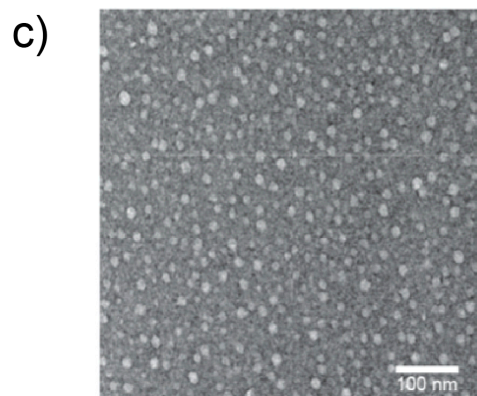

**Figure S1.** a)  $^1\text{H}$  NMR spectrum of PONI-C11-TMA. The polymer self-assembles into cationic polymeric nanoparticles (PNPs) characterized by b) dynamic light scattering (DLS) measurement and c) transmission electron microscopy (TEM) imaging.

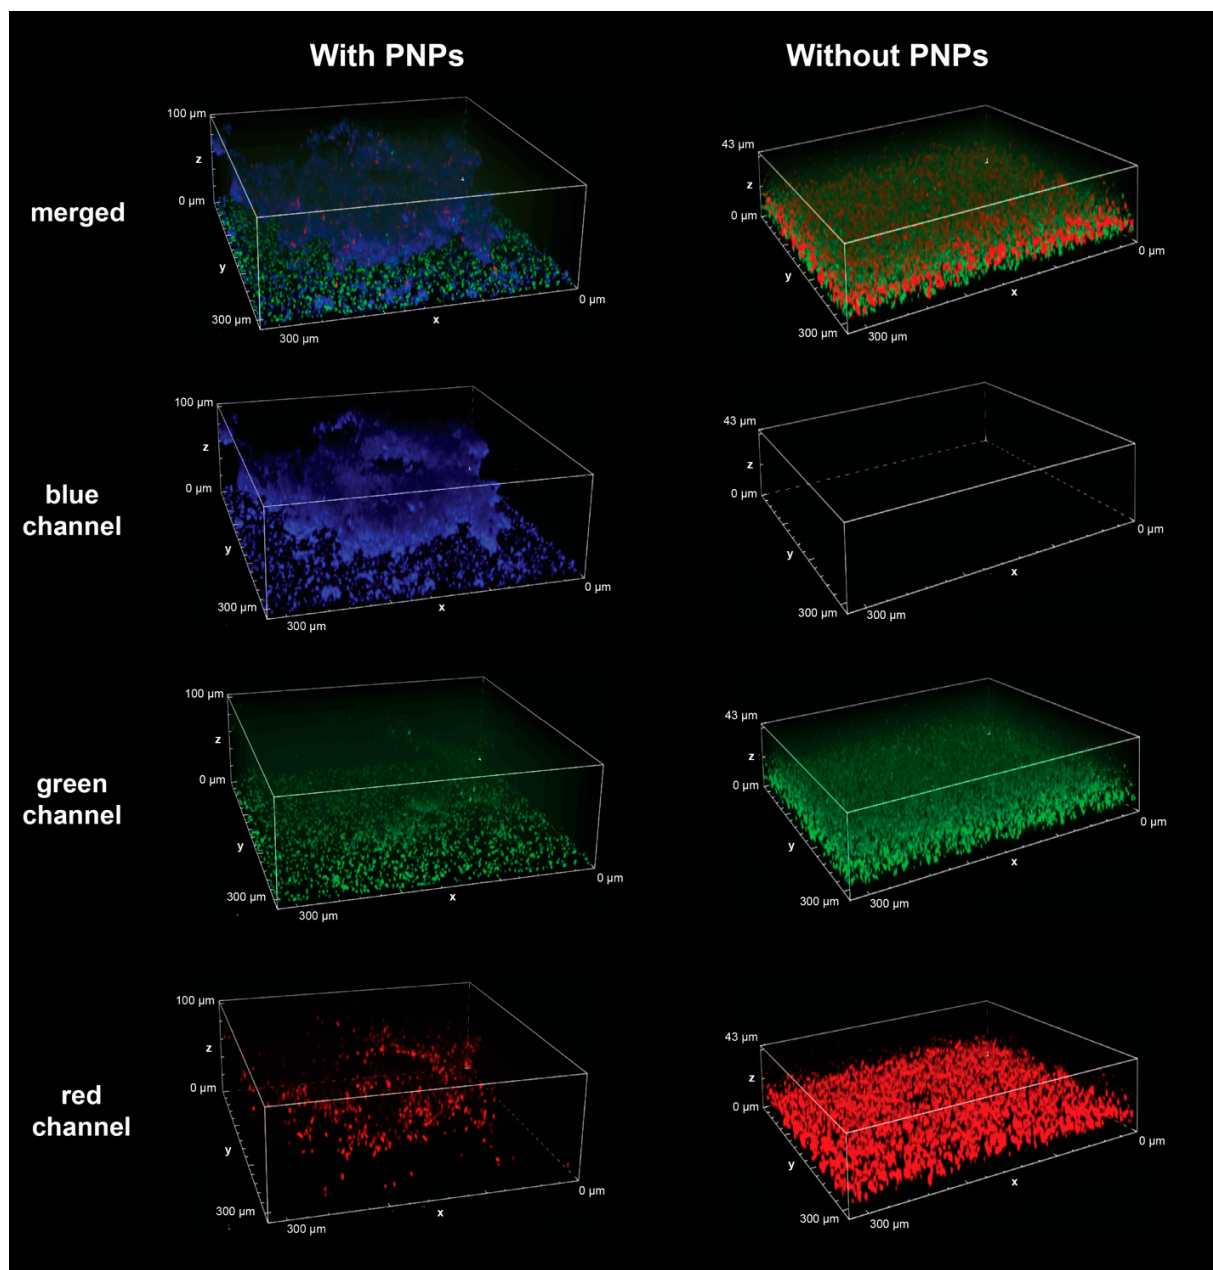

**Figure S2.** Representative 3D views of confocal image stacks of 4-day old dual-species biofilm of DsRed-expressing *Escherichia coli* (red channel) and GFP-expressing methicillin-resistant *Staphylococcus aureus* (green channel), coumarin blue-tagged PNPs (blue channel), and their overlay after treating the biofilms for 1 h with 1  $\mu$ M coumarin blue-tagged PNPs in M9 media. The biofilms were imaged immediately without washing. Untreated biofilm, serving as the negative control, was prepared similarly without treatment with PNPs.

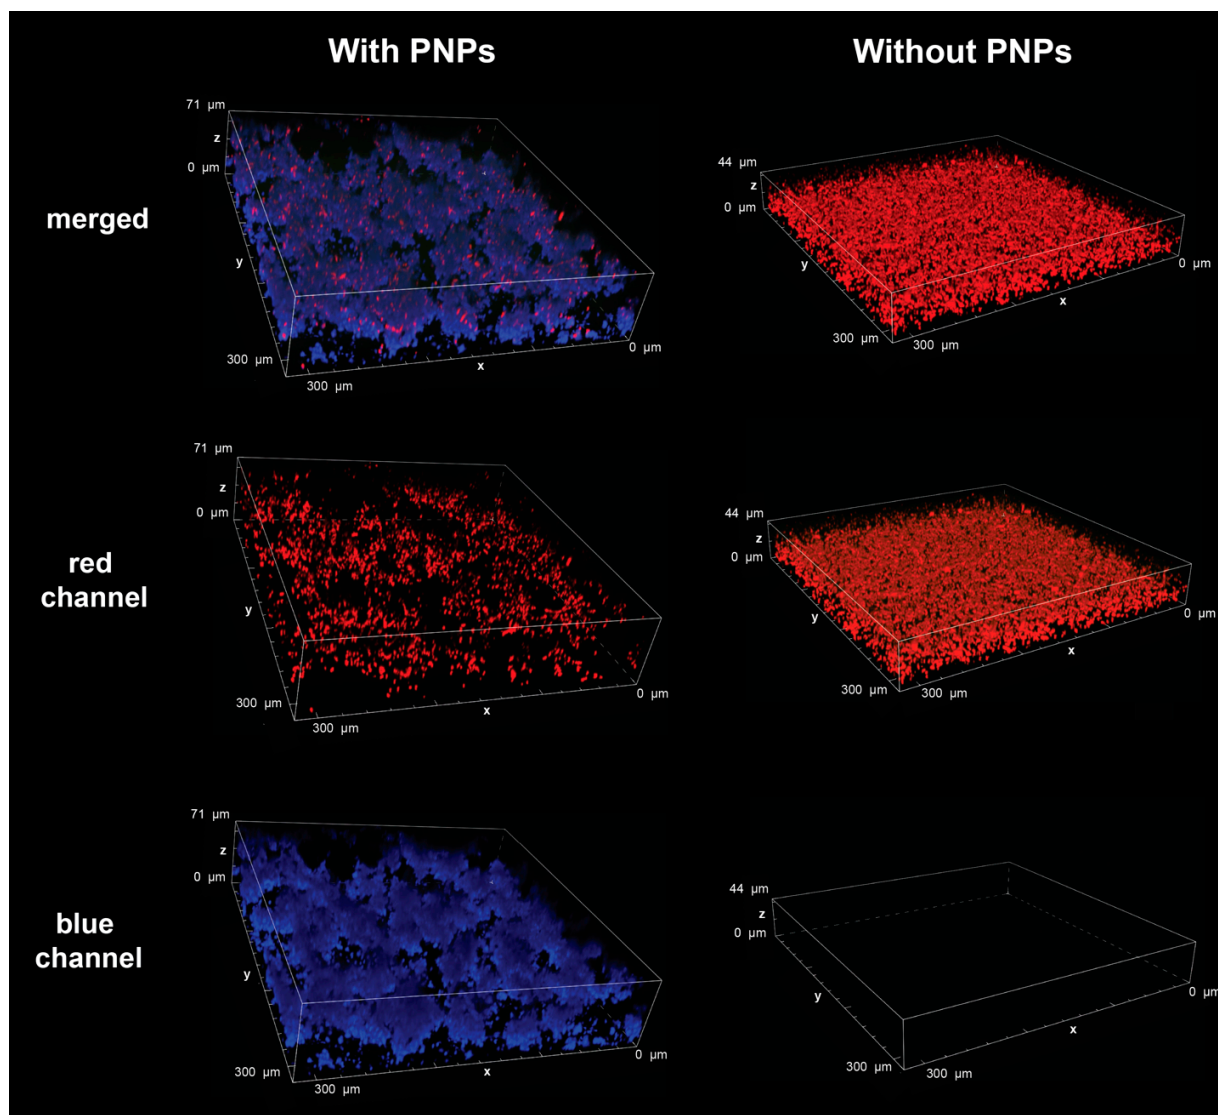

**Figure S3.** Representative 3D views of confocal image stacks of 4-day old biofilm of DsRed-expressing *Escherichia coli* (red channel) and coumarin blue-tagged PNPs (blue channel), and their overlay after treating the biofilms for 1 h with 1  $\mu$ M coumarin blue-tagged PNPs in M9 media. The biofilms were imaged immediately without washing. Untreated biofilm, serving as the negative control, was prepared similarly without treatment with PNPs.

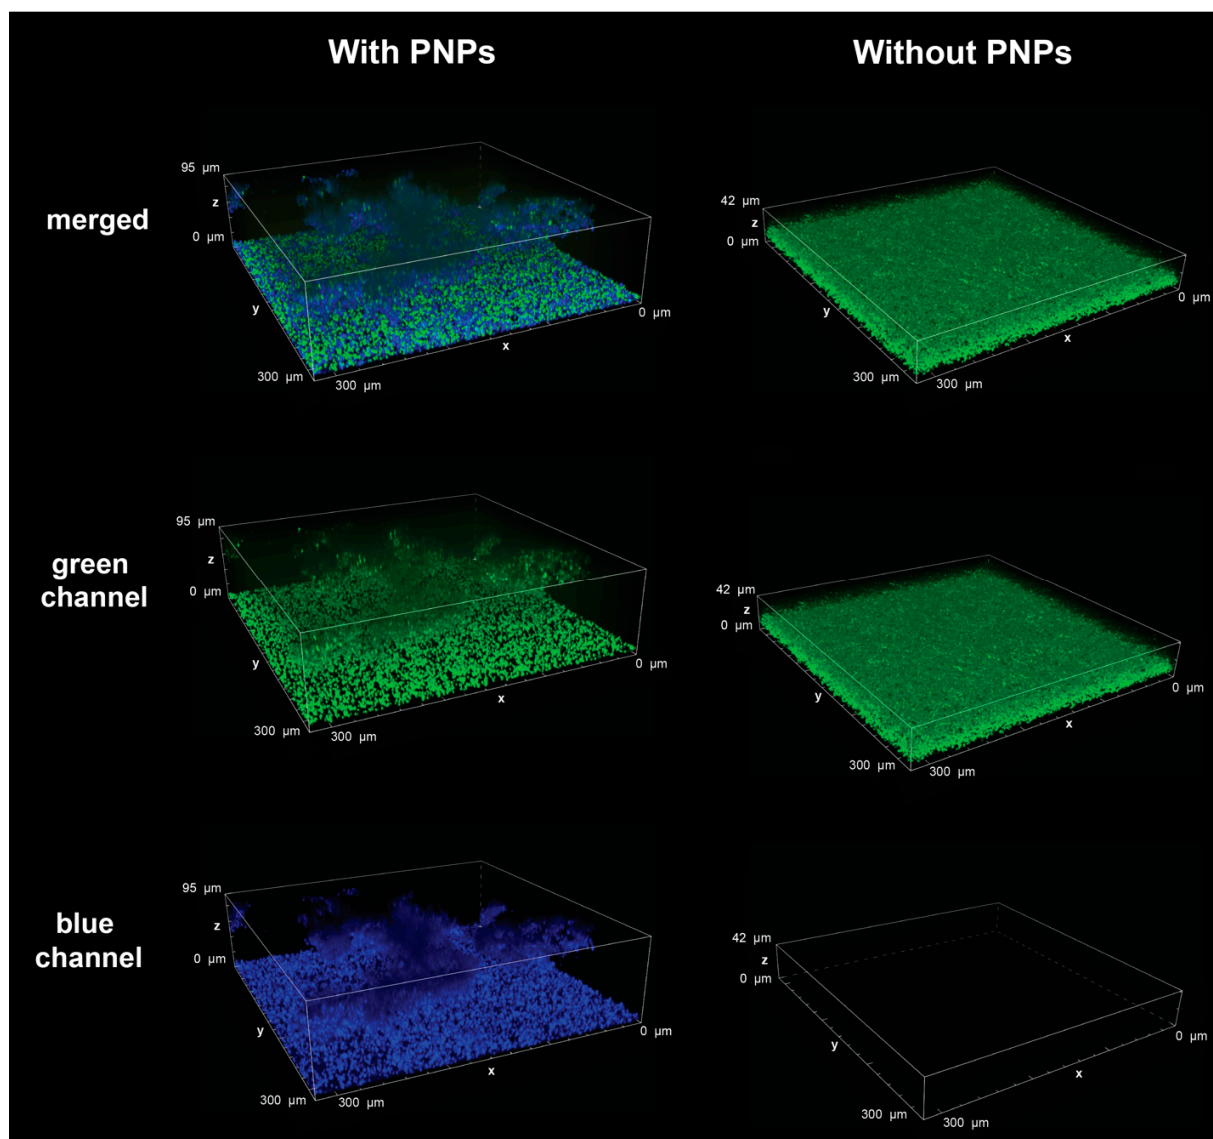

**Figure S4.** Representative 3D views of confocal image stacks of 4-day old biofilm of GFP-expressing methicillin-resistant *Staphylococcus aureus* (green channel) and coumarin blue-tagged PNPs (blue channel), and their overlay after treating the biofilms for 1 h with 1  $\mu\text{M}$  coumarin blue-tagged PNPs in M9 media. The biofilms were imaged immediately without washing. Untreated biofilm, serving as the negative control, was prepared similarly without treatment with PNPs.

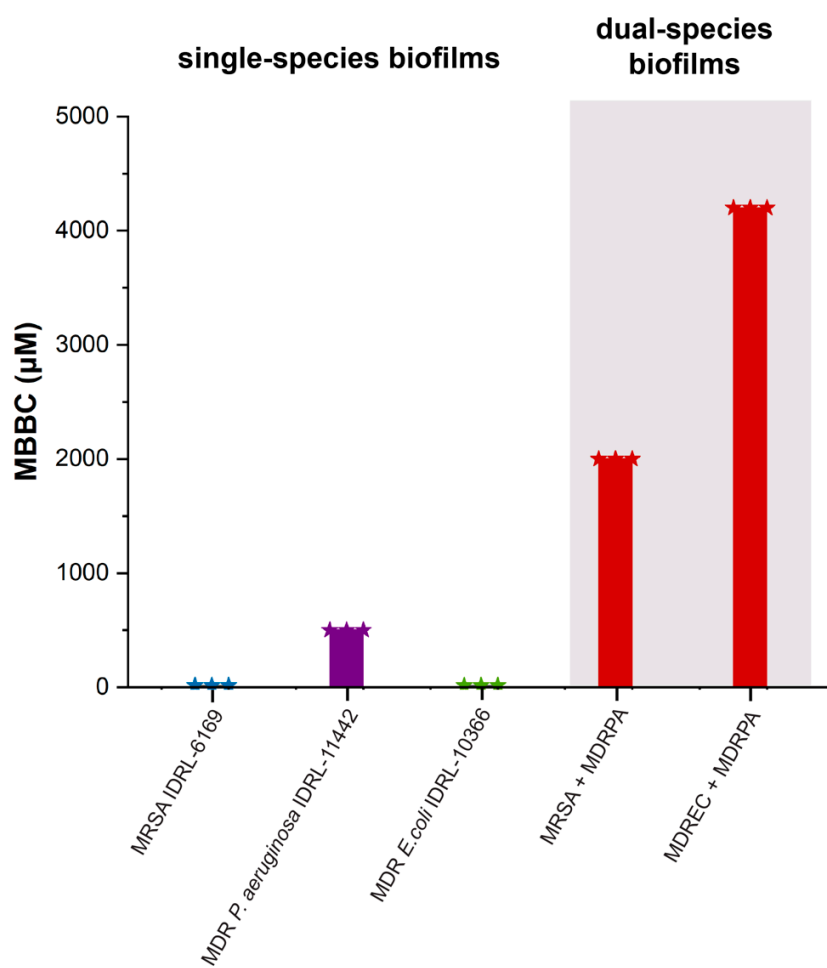

**Figure S5.** MBBC values of gentamicin against mono-species [Gram-positive: Methicillin-resistant *Staphylococcus aureus* (MRSA) IDRL-6169; Gram-negative: multi-drug resistant (MDR) *Pseudomonas aeruginosa* IDRL-11442, MDR *Escherichia coli* IDRL-10366] and dual-species biofilms (MRSA + MDR *P. aeruginosa*; MDR *P. aeruginosa* + MDR *E. coli*). Bars represent average value while stars represent individual measurements.

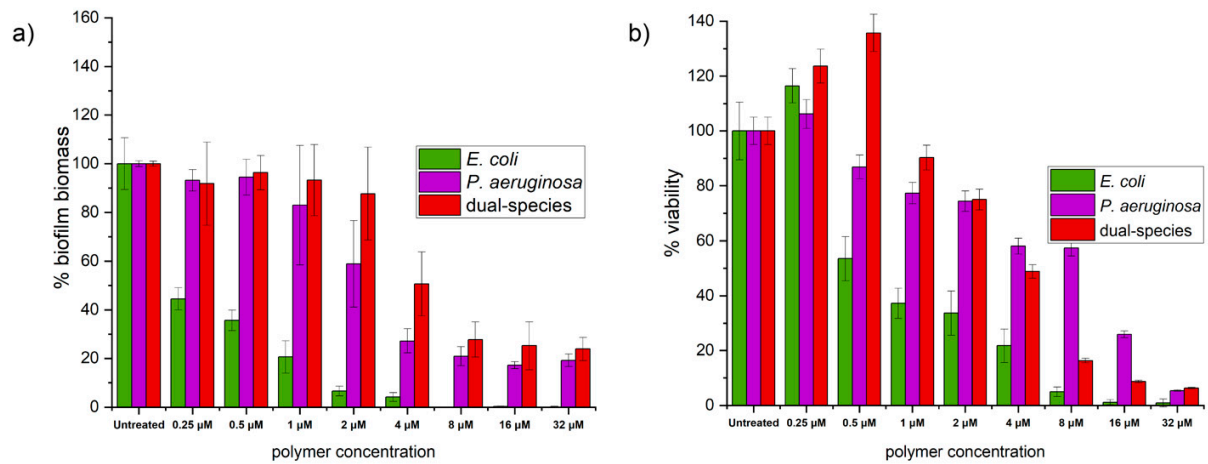

**Figure S6.** a) Biomass and b) bacteria viability of 2-day-old mono- and dual-species biofilms of MDR *Escherichia coli* IDRL-10366 + MDR *Pseudomonas aeruginosa* IDRL-11442 after 3 hours of treatment with PNPs. The data shown are average of triplicates and the error bars indicate the standard deviation.

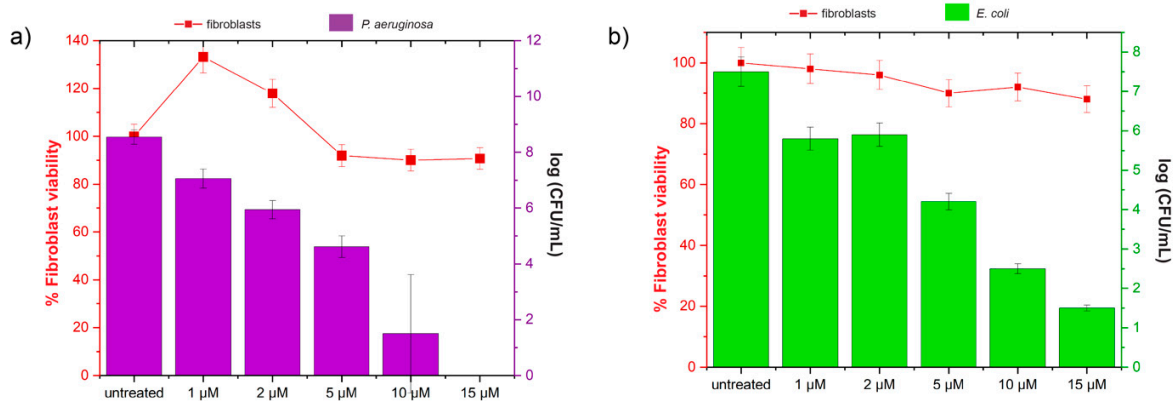

**Figure S7.** Viability of a) 3T3 fibroblast cells and *Pseudomonas aeruginosa* ATCC-19660 biofilm and b) 3T3 fibroblast cells and *Escherichia coli* DH5 $\alpha$  biofilm dual-species biofilms in the co-culture model after treatment with PNPs. Scatters and lines represent 3T3 fibroblast cell viability. Bars represent log<sub>10</sub> of colony forming units in biofilms. The data are average of triplicates, and the error bars indicate the standard deviations.
